# Supplementary material for: Aligner optimization increases accuracy and decreases compute times in multi-species sequence data
Source: PubMed Central journal article supplement (PMC5643015; doi:10.1099/mgen.0.000122), 2017-07-08
Supplement: mgen-3-122-s001.pdf [file mgen-3-122-s001.pdf]

1 **Supplementary Table 1. The Percentage of Read Pairs for Seed Lengths >30 Nucleotides.**

2 The percentage is provided of read pairs for one of the *Plasmodium*-human datasets ([ERR015379](#)) aligned to each reference for BWA-ALN with  
3 default parameters and BWA-MEM with seed lengths from 18-30 nucleotides.

| <b>Reference</b>   | <b>40</b> | <b>50</b> | <b>60</b> | <b>70</b> | <b>72</b> | <b>74</b> | <b>75</b> | <b>76</b> |
|--------------------|-----------|-----------|-----------|-----------|-----------|-----------|-----------|-----------|
| Human              | 13.1      | 10.2      | 7.9       | 5.0       | 4.7       | 4.5       | 4.4       | 4.3       |
| <i>Plasmodium</i>  | 90.8      | 85.6      | 79.4      | 66.1      | 64.8      | 63.6      | 63.0      | 62.2      |
| Combined Reference | 79.0      | 75.7      | 71.5      | 61.1      | 60.1      | 59.1      | 58.6      | 58.0      |



**Supplementary Table 3. Percentage of reads mapping to the human genome after removing reads aligning to the human genome with ALN**

| <b>Seed length</b> | <b>After removing reads (%)</b> | <b>Originally aligned with MEM (%)</b> |
|--------------------|---------------------------------|----------------------------------------|
| 18                 | 15.30611                        | 24.1                                   |
| 19                 | 13.27906                        | 22.4                                   |
| 20                 | 11.88606                        | 21.2                                   |
| 21                 | 10.96001                        | 20.4                                   |
| 22                 | 10.41483                        | 19.9                                   |
| 23                 | 10.06839                        | 19.6                                   |
| 24                 | 9.841806                        | 19.4                                   |
| 25                 | 9.661077                        | 19.2                                   |
| 26                 | 9.499251                        | 19.1                                   |
| 27                 | 9.348837                        | 19                                     |
| 28                 | 9.173822                        | 18.8                                   |
| 29                 | 9.035228                        | 18.7                                   |
| 30                 | 8.875695                        | 18.5                                   |
| 40                 | 3.1982                          | 13.1                                   |
| 50                 | 0.975156                        | 10.2                                   |
| 60                 | 0.250332                        | 7.9                                    |
| 70                 | 0.00418                         | 5                                      |
| 72                 | 7.4E-05                         | 4.7                                    |
| 74                 | 0                               | 4.5                                    |
| 75                 | 0                               | 4.4                                    |
| 76                 | 0                               | 4.3                                    |
